# Supplementary material
Source: PubMed Central journal article supplement (PMC2780016)
Supplement: NIHMS117491-supplement-Supplementary_information.pdf [file NIHMS117491-supplement-Supplementary_information.pdf]

**Improved, selective, human intestinal carboxylesterase inhibitors designed to modulate 7-ethyl-10-[4-(1-piperidino)-1-piperidino]carbonyloxycamptothecin (irinotecan; CPT-11) toxicity**

Latorya D. Hicks, Janice L Hyatt, Shana Stoddard, Lyudmila Tsurkan, Carol C.

Edwards, Randy M. Wadkins and Philip M. Potter

Physical properties of the sulfonamides synthesized for this article.

| Compound                     | MP (°C)          | <sup>1</sup> H NMR<br>(400MHz, DMSO d <sub>6</sub> )                                                                   | <sup>13</sup> C NMR<br>(400MHz, DMSO d <sub>6</sub> or<br>acetone d <sub>6</sub> ) | HRMS<br>ESI<br>[M <sup>+</sup> ] | Elemental Analysis                                                                                                                                                                                                                   |
|------------------------------|------------------|------------------------------------------------------------------------------------------------------------------------|------------------------------------------------------------------------------------|----------------------------------|--------------------------------------------------------------------------------------------------------------------------------------------------------------------------------------------------------------------------------------|
| <b>14</b><br>White solid     | 225-227<br>(dec) | δ 10.4 (s, 2H, NH x 2), δ 7.7 (m, J = 7.68 Hz, 4H), δ 7.5 (m, J = 7.33 Hz, 4H), δ 6.94 (s, 4H)                         | δ 159.23, 156.69, 135.83, 133.40, 130.28, 126.74, 124.81, 121.30, 117.18, 116.98   | 424.4                            | Anal. (C <sub>18</sub> H <sub>14</sub> F <sub>2</sub> N <sub>2</sub> O <sub>4</sub> S <sub>2</sub> ); calc. (%) C 50.94, H 3.32, F 8.95, N 6.60, O 15.08, S 15.11; found, (%) C 50.93, H 3.37, F 8.92, N 6.61, O 15.19, S 15.25      |
| <b>15</b><br>White solid     | 228-230<br>(dec) | δ 10.25 (s, 2H, NH X 2), δ 7.58 (m, J = 7.3 Hz, 2H), δ 7.48 (m, J = 7.0 Hz, 4H), δ 7.43 (d, J = 2H); δ 6.98 (s, 4H);   | δ 162.69, 160.22, 141.16, 133.77, 131.54, 122.80, 121.93, 120.13, 113.63, 113.39   | 424.4                            | Anal. (C <sub>18</sub> H <sub>14</sub> F <sub>2</sub> N <sub>2</sub> O <sub>4</sub> S <sub>2</sub> ); calc. (%) C 50.94, H 3.32, F 8.95, N 6.60, O 15.08, S 15.11; found, (%) C 51.08, H 3.32, F 8.68, N 6.65, O 15.25, S 15.30      |
| <b>16</b><br>White solid     | 250-252<br>(dec) | δ 10.16 (s, 2H, NH x 2), δ 7.8 (s, J = 7.71 Hz, 4H), δ 7.5 (m, J = 7.36 Hz, 4H), δ 7.0 (m, J = 6.92 Hz, 4H)            | δ 165.34, 163.24, 135.49, 133.88, 129.60, 121.79, 116.38                           | 424.4                            | Anal. (C <sub>18</sub> H <sub>14</sub> F <sub>2</sub> N <sub>2</sub> O <sub>4</sub> S <sub>2</sub> ); calc. (%) C 50.94, H 3.32, F 8.95, N 6.60, O 15.08, S 15.11; found, (%) C 50.79, H 3.34, F 8.78, N 6.61, O 15.33, S 14.87      |
| <b>17</b><br>Pale pink solid | 220-222<br>(dec) | δ 10.3 (s, 2H, NH x 2), δ 7.75 (m, J = 7.43 Hz, 4H), δ 7.55 (m, J = 7.45 Hz, 4H), δ 7.0 (s, 4H);                       | δ 136.22, 133.75, 124.56, 122.07                                                   | 457.4                            | Anal. (C <sub>18</sub> H <sub>14</sub> Cl <sub>2</sub> N <sub>2</sub> O <sub>4</sub> S <sub>2</sub> ); calc. (%) C 47.27, H 3.09, Cl 15.50, N 6.13, O 13.99, S 14.02; found, (%) C 47.15, H 3.11, Cl 15.72, N 6.09, O 13.78, S 14.07 |
| <b>18</b><br>White solid     | 243-245<br>(dec) | δ 10.2 (s, 2H, NH x 2), δ 7.9 (m, J = 7.82 Hz, 4H), δ 7.7 (dd, J = 7.62 Hz, 2H), δ 7.5 (t, J = 7.48, 2H) δ 7.0 (s, 4H) | δ 141.07, 135.69, 133.76, 131.34, 128.85, 125.54, 121.97                           | 546.2                            | Anal. (C <sub>18</sub> H <sub>14</sub> Br <sub>2</sub> N <sub>2</sub> O <sub>4</sub> S <sub>2</sub> ); calc. (%) C 39.58, H 2.55, Br 26.96, N 5.13, O 11.72, S 11.74; found, (%) C 39.22, H 2.53, Br 26.94, N 4.88, O 11.54, S 11.43 |
| <b>19</b><br>White solid     | 287-289<br>(dec) | δ 10.2 (s, 2H, NH x 2), δ 7.73 (d, J = 13.8 Hz, 4H), δ 7.55 (d, J = 13 Hz, 4H), δ 6.95 (s, 4H)                         | δ 138.39, 133.79, 132.16, 128.53, 126.66, 115.25                                   | 546.2                            | Anal. (C <sub>18</sub> H <sub>14</sub> Br <sub>2</sub> N <sub>2</sub> O <sub>4</sub> S <sub>2</sub> ); calc. (%) C 39.58, H 2.55, Br 29.26, N 5.13, O 11.72, S 11.74; found, (%) C 39.25, H 2.55, Br 28.94, N 4.86, O 11.58, S 11.47 |
| <b>20</b><br>White solid     | 253-255<br>(dec) | δ 10.2 (s, 2H, NH X 2), δ 7.7 (m, J = 7.68 Hz, 2H), δ 7.25 (m, J = 7.19 Hz, 4H), δ 7.0 (s, 4H)                         | δ 160.01, 159.98, 136.03, 135.81, 121.21, 116.23, 113.38                           | 460.4                            | Anal. (C <sub>18</sub> H <sub>12</sub> F <sub>4</sub> N <sub>2</sub> O <sub>4</sub> S <sub>2</sub> ); calc. (%) C 46.96, H 2.63, F 16.51, N 6.08, O 13.90, S 13.93; found, (%) C 46.72, H 2.79, F, N 6.61, O 13.95, S 13.83          |
| <b>21</b><br>Pink solid      | 238-240<br>(dec) | δ 10.26 (s, 2H, NH x 2), δ 7.55 (m, J = 7.64 Hz, 6H), δ 7.0 (s, 4H)                                                    | δ 140.94, 133.76, 132.82, 131.15, 126.07, 125.22, 121.97                           | 460.4                            | Anal. (C <sub>18</sub> H <sub>12</sub> F <sub>4</sub> N <sub>2</sub> O <sub>4</sub> S <sub>2</sub> ); calc. (%) C 46.96, H 2.63, F 16.51, N 6.08, O 13.90, S 13.93; found, (%) C 46.72, H 2.78, F 16.23, N 6.21, O 13.94, S 13.83    |

|                                 |                  |                                                                                                                                                                                      |                                                                                                                       |       |                                                                                                                                                                                                                                      |
|---------------------------------|------------------|--------------------------------------------------------------------------------------------------------------------------------------------------------------------------------------|-----------------------------------------------------------------------------------------------------------------------|-------|--------------------------------------------------------------------------------------------------------------------------------------------------------------------------------------------------------------------------------------|
| <b>22</b><br>Pale pink<br>solid | 234-236          | $\delta$ 10.5 (s, 2H, NH x 2), $\delta$ 7.85 (m, J = 7.6 Hz, 4H), $\delta$ 7.60 (d, J = 7.5 Hz, 2H), $\delta$ 7.0 (s, 4H);                                                           | $\delta$ 163.33, 160.83, 142.36, 133.71, 122.28, 110.30, 108.78                                                       | 460.4 | Anal. (C <sub>18</sub> H <sub>12</sub> F <sub>4</sub> N <sub>2</sub> O <sub>4</sub> S <sub>2</sub> ); calc. (%) C 46.96, H 2.63, F 16.51, N 6.08, O 13.90, S 13.93; found, (%) C 46.61, H 2.78, F 16.35, N 6.03, O 13.96, S 13.86    |
| <b>23</b><br>White solid        | 243-245          | $\delta$ 10.5 (s, 2H, NH x 2), $\delta$ 8.0 (dd, J = 7.59 Hz, 4H), $\delta$ 7.2 (d, J = 7.0 Hz, 4H);                                                                                 | $\delta$ 133.64, 121.39, 112.22                                                                                       | 496.4 | Anal. (C <sub>18</sub> H <sub>10</sub> F <sub>6</sub> N <sub>2</sub> O <sub>4</sub> S <sub>2</sub> ); calc. (%) C 43.55, H 2.03, F 22.96, N 5.64, O 12.89, S 12.92; found, (%) C 43.39, H 2.03, F 22.95, N 5.52, O 13.13, S 12.96    |
| <b>24</b><br>Pink solid         | 296-298<br>(dec) | $\delta$ 10.5 (2, 2H, NH x 2), $\delta$ 7.95 (d, J = 13.4, 4H), $\delta$ 7.75 (d, J = 13.4 Hz, 2H), $\delta$ 7.0 (s, 4H)                                                             | $\delta$ 138.42, $\delta$ 134.86, $\delta$ 134.02, $\delta$ 133.01, $\delta$ 128.66, $\delta$ 128.38, $\delta$ 121.06 | 526.4 | Anal. (C <sub>18</sub> H <sub>12</sub> Cl <sub>4</sub> N <sub>2</sub> O <sub>4</sub> S <sub>2</sub> ); calc. (%) C 41.08, H 2.30, Cl 26.95, N 5.32, O 12.16, S 12.19; found, (%) C 40.74, H 2.41, Cl 27.04, N 5.47, O 12.12, S 11.85 |
| <b>26</b><br>Pink solid         | 293-295<br>(dec) | $\delta$ 10.4 (s, 2H, NH x 2), $\delta$ 7.7 (m, J = 7.76 Hz, 4H), $\delta$ 7.66 (dd, J = 7.56 Hz, 2H), $\delta$ 7.0 (s, 4H)                                                          | $\delta$ 139.36, 135.96, 133.69, 132.01, 131.54, 126.62, 122.20                                                       | 526.4 | Anal. (C <sub>18</sub> H <sub>12</sub> Cl <sub>4</sub> N <sub>2</sub> O <sub>4</sub> S <sub>2</sub> ); calc. (%) C 41.08, H 2.30, Cl 26.95, N 5.32, O 12.16, S 12.19; found, (%) C 41.17, H 2.25, Cl 27.02, N 5.31, O 12.12, S 12.12 |
| <b>27</b><br>Pink solid         | 289-291<br>(dec) | $\delta$ 10.5 (s, 2H, NH x 2), $\delta$ 7.9 (s, 2H), $\delta$ 7.6 (s, 4H), $\delta$ 7.0 (s, 4H);                                                                                     | $\delta$ 142.07, 134.94, 133.64, 132.54, 125.03, 122.30                                                               | 526.4 | Anal. (C <sub>18</sub> H <sub>12</sub> Cl <sub>4</sub> N <sub>2</sub> O <sub>4</sub> S <sub>2</sub> ); calc. (%) C 41.08, H 2.30, Cl 26.95, N 5.32, O 12.16, S 12.19; found, (%) C 41.19, H 2.35, Cl 27.0, N 5.32, O 12.02, S 12.24  |
| <b>46</b><br>Yellow<br>solid    | 243-245<br>(dec) | $\delta$ 9.8 (s, 2H, NH x 2), $\delta$ 7.7 (m, J = 7.68 Hz, 4H), $\delta$ 7.45 (t, J = 7.24 Hz, 4H), $\delta$ 1.76 (s, 12H);                                                         | $\delta$ 140.28, 137.29, 134.47, 131.94, 129.22, 128.38, 15.99                                                        | 480.6 | Anal. (C <sub>22</sub> H <sub>22</sub> F <sub>2</sub> N <sub>2</sub> O <sub>4</sub> S <sub>2</sub> ); calc. (%) C 54.99, H 4.61, F 7.91, N 5.83, O 13.35, S 13.35; found, (%) C 54.75, H 4.74, F 7.68, N 5.91, O 13.30, S 13.23      |
| <b>47</b><br>Yellow<br>solid    | 247-249<br>(dec) | $\delta$ 9.62 (s, 2H, NH x 2), $\delta$ 7.7 (d, J = 7.76 Hz, 2H), $\delta$ 7.55 (m, J = 7.67 Hz, 6H), $\delta$ 1.79 (s, 12H);                                                        | $\delta$ 143.14, 134.49, 133.67, 132.42, 1313.91, 131.27, 125.97, 125.03, 124.71, 15.92                               | 513.4 | Anal. (C <sub>22</sub> H <sub>22</sub> Cl <sub>2</sub> N <sub>2</sub> O <sub>4</sub> S <sub>2</sub> ); calc. (%) C 51.46, H 4.32, Cl 13.81, N 5.46, O 12.46, S 12.49; found, (%) C 51.39, H 4.34, Cl 13.65, N 5.31, O 12.33, S 12.42 |
| <b>48</b><br>Yellow<br>solid    | 216-218<br>(dec) | $\delta$ 9.5 (s, 2H, NH x 2), $\delta$ 7.65 (s, 4H), $\delta$ 7.45 (s, 4H), $\delta$ 1.76 (s, 12H)                                                                                   | $\delta$ 140.29, 137.30, 134.49, 131.96, 129.22, 128.39, 128.22, 16.0                                                 | 513.4 | Anal. (C <sub>22</sub> H <sub>14</sub> Cl <sub>2</sub> N <sub>2</sub> O <sub>4</sub> S <sub>2</sub> ); calc. (%) C 51.46, H 4.32, Cl 13.81, N 5.46, O 12.46, S 12.49; found, (%) C 51.62, H 4.23, Cl 13.53, N 5.36, O 12.36, S 12.26 |
| <b>49</b><br>Yellow<br>solid    | 241-243<br>(dec) | $\delta$ 9.62 (s, 2H, NH x 2), $\delta$ 7.9 (d, J = 7.88 Hz, 2H), $\delta$ 7.75 (d, J = 7.71 Hz, 2H), $\delta$ 7.65 (d, J = 7.63, 2H), $\delta$ 7.59 (m, J = 7.56, 2H) 1.79 (s, 12H) | $\delta$ 143.15, 134.51, 131.93, 131.27, 125.98, 128.03, 15.93                                                        | 602.4 | Anal. (C <sub>22</sub> H <sub>22</sub> Br <sub>2</sub> N <sub>2</sub> O <sub>4</sub> S <sub>2</sub> ); calc. (%) C 43.87, H 3.68, Br 26.53, N 4.65, O 10.62, S 10.65; found, (%) C 43.92, H 3.59, Br 26.46, N 4.72, O 10.62, S 10.42 |
| <b>50</b><br>Yellow<br>solid    | 295-297<br>(dec) | $\delta$ 9.62 (s, 2H, NH x 2), $\delta$ 7.9 (s, 8H), $\delta$ 1.8 (s, 12H)                                                                                                           | $\delta$ 140.27, 137.28, 134.47, 131.94, 129.22, 128.38, 15.98                                                        | 602.4 | Anal. (C <sub>22</sub> H <sub>22</sub> Br <sub>2</sub> N <sub>2</sub> O <sub>4</sub> S <sub>2</sub> ); calc. (%) C 43.87, H 3.68, Br 26.53, N 4.65, O 10.62, S 10.65; found, (%) C 43.97, H 3.60, Br 26.55, N 4.75, O 10.54, S 10.47 |
| <b>51</b><br>Yellow<br>solid    | 263-265          | $\delta$ 9.73 (s, 2H, NH x 2), $\delta$ 7.9 (d, J = 7.87 2H), $\delta$ 7.75 (s, 2H), $\delta$ 7.65 (d, J = 7.60 2H) 1.8 (s, 12H)                                                     | $\delta$ 141.69, 131.95, 131.66, 128.06, 126.49 16.02                                                                 | 582.3 | Anal. (C <sub>22</sub> H <sub>22</sub> Cl <sub>2</sub> N <sub>2</sub> O <sub>4</sub> S <sub>2</sub> ); calc. (%) C 45.37, H 3.46, Cl 24.35, N 4.81, O 10.99, S 11.01; found, (%) C 45.54, H 3.60, Cl 24.55, N 4.78, O 10.74, S 10.98 |
| <b>52</b><br>Yellow<br>solid    | 256-258<br>(dec) | $\delta$ 9.83 (s, 2H, NH x 2), $\delta$ 8.0 (s, 2H), $\delta$ 7.55 (s, 4H), $\delta$ 1.8 (s, 12H)                                                                                    | $\delta$ 135.26, 132.12, 124.82, 15.96                                                                                | 582.3 | Anal. (C <sub>22</sub> H <sub>22</sub> Cl <sub>2</sub> N <sub>2</sub> O <sub>4</sub> S <sub>2</sub> ); calc. (%) C 45.37, H 3.46, Cl 24.35, N 4.81, O 10.99, S 11.01; found, (%) C 45.52, H 3.60, Cl 24.55, N 4.75, O 10.89, S 10.89 |

|                           |                  |                                                                                                                                                                    |                                                                                                                                   |       |                                                                                                                                                                                                                                                                                     |
|---------------------------|------------------|--------------------------------------------------------------------------------------------------------------------------------------------------------------------|-----------------------------------------------------------------------------------------------------------------------------------|-------|-------------------------------------------------------------------------------------------------------------------------------------------------------------------------------------------------------------------------------------------------------------------------------------|
| <b>53</b><br>White solid  | 198-200          | 7.90 (d, J = 7.95 Hz, 4H),<br>δ 7.80 (d, J = 7.85 Hz,<br>4H), δ 6.82 (s, 2H, NH x 2)                                                                               | δ 166.86, 164.33,<br>134.15, 131.60, 117.01                                                                                       | 496.4 | Anal. (C <sub>18</sub> H <sub>10</sub> F <sub>6</sub> N <sub>2</sub> O <sub>4</sub> S <sub>2</sub> ); calc.<br>(%) C 43.55, H 2.03, F 22.96, N<br>5.64, O 12.89, S 12.92; found,<br>(%) C 43.80, H 2.14, F 23.0, N<br>5.62, O 13.09, S 12.65                                        |
| <b>54</b><br>White solid  | 253-255          | δ 8.0 (d, J = 7.95 Hz, 4H),<br>δ 7.6 (d, J = 7.58 Hz, 4H),<br>δ 6.80 (s, 2H, NH x 2)                                                                               | δ 145.63, 143.22,<br>132.73, 130.09                                                                                               | 618.2 | Anal. (C <sub>18</sub> H <sub>14</sub> F <sub>4</sub> Br <sub>2</sub> N <sub>2</sub> O <sub>4</sub> S <sub>2</sub> ); calc.<br>(%) C 34.97, H 1.63, F 12.29, Br<br>25.85, N 4.53, O 10.35, S 10.37;<br>found, (%) C 35.0, H 1.69, F<br>12.35, Br 25.72, N 4.48, O<br>10.41, S 10.33 |
| <b>56</b><br>Tan<br>solid | 248-250          | δ 10.2 (s, 2H, NH x 2), δ<br>7.6 (d, J = 7.74 Hz, 4H), δ<br>7.6 (m, 8H), δ 7.25 (s, 2H),<br>δ 7.1 (s, 2H) δ 3.74 (s, 2H)                                           | δ 156.84, 148.24,<br>143.77, 138.98,<br>136.06, 132.73,<br>127.54, 125.38, 120.0,<br>119.11, 117.17,<br>106.86, 38.81             | 476.6 | Anal. (C <sub>22</sub> H <sub>22</sub> Br <sub>2</sub> N <sub>2</sub> O <sub>4</sub> S <sub>2</sub> ); calc.<br>(%) C 43.87, H 3.68, Br 26.53, N<br>4.65, O 10.62, S 10.65; found,<br>(%) C 43.97, H 3.60, Br 26.55,<br>N 4.75, O 10.54, S 10.47                                    |
| <b>57</b><br>Tan solid    | 200-202<br>(dec) | δ 10.5 (s, 2H, NH x 2), δ<br>7.7 (d, J = 7.68 Hz, 6H), δ<br>7.4 (s, 2H), δ 7.19 (d, J =<br>7.09, 2H), δ 3.89 (s, 2H)                                               | δ 154.23, 152.21,<br>145.65, 139.34,<br>136.44, 136.36,<br>121.90, 121.32,<br>119.82, 113.49, 37.47                               | 634.4 | Anal. (C <sub>25</sub> H <sub>14</sub> F <sub>6</sub> N <sub>2</sub> O <sub>4</sub> S <sub>2</sub> ); calc.<br>(%) C 51.37, H 2.41, F 19.50, N<br>4.79, O 10.95, S 10.97; found,<br>(%) C 51.19, H 2.33, F 19.79, N<br>4.69, O 10.89, S 10.90                                       |
| <b>58</b><br>Tan solid    | 212-214<br>(dec) | δ 10.32 (s, 2H, NH x 2), δ<br>7.78 (d, J = 7.71 Hz, 4H),<br>δ 7.62 (t, J = 7.59, 6H), δ<br>7.55 (s, 2H), δ 7.25 (d, J =<br>7.20, 2H) δ 3.89 (s, 2H)                | δ 145.37, 140.09,<br>139.30, 140.02,<br>138.96, 136.99,<br>133.10, 129.88,<br>129.63, 127.83,<br>121.42, 121.08,<br>119.34, 37.42 | 545.5 | Anal. (C <sub>25</sub> H <sub>22</sub> Br <sub>2</sub> N <sub>2</sub> O <sub>4</sub> S <sub>2</sub> ); calc.<br>(%) C 47.33, H 2.86, Br 25.19, N<br>4.42, O 10.09, S 10.11; found,<br>(%) C 47.0, H 2.86, Br 25.40, N<br>4.42, O 10.0, S 10.11,                                     |
| <b>59</b><br>Tan solid    | 203-205<br>(dec) | δ 10.5 (s, 2H, NH x 2), δ<br>7.7 (d, J = 7.67 Hz, 10H),<br>δ 7.3 (s, 2H), δ 7.1 (d, J =<br>7.06, 2H), δ 3.85 (s, 2H)                                               | δ 143.99, 141.16,<br>133.68, 131.25,<br>120.23, 119.47,<br>117.58, 121.45,<br>121.06, 36.55                                       | 624.2 | Anal. (C <sub>25</sub> H <sub>18</sub> Cl <sub>2</sub> N <sub>2</sub> O <sub>4</sub> S <sub>2</sub> ); calc.<br>(%) C 52.05, H 3.33, Cl 13.0, N<br>5.14, O 11.73, S 11.76; found,<br>(%) C 54.98, H 3.37, Cl 12.97, N<br>5.21, O 11.71, S 11.99                                     |
| <b>60</b><br>Tan solid    | 210-212<br>(dec) | δ 10.4 (s, 2H, NH x 2), δ<br>7.8 (t, J = 7.74 Hz, 4H), δ<br>7.65 (t, J = 7.62Hz, 6H), δ<br>7.32 (d, J = 7.28Hz, 2H), δ<br>7.2 (d, J = 7.07, 2H), δ<br>3.75 (s, 2H) | δ 143.96, 138.17,<br>137.67, 137.06,<br>135.79, 129.31,<br>128.53, 120.18,<br>119.45, 117.51, 36.31                               | 545.5 | Anal. (C <sub>25</sub> H <sub>22</sub> Cl <sub>2</sub> N <sub>2</sub> O <sub>4</sub> S <sub>2</sub> ); calc.<br>(%) C 55.05, H 3.33, Cl 13.0, N<br>5.14, O 11.73, S 11.76; found,<br>(%) C 54.98, H 3.36, Cl 13.05,<br>N 5.20, O 11.65, S 12.01                                     |
